# Supplementary material for: Fe3O4/Fe2O3/Fe nanoparticles anchored on N-doped hierarchically porous carbon nanospheres as a high-efficiency ORR electrocatalyst for rechargeable Zn–air batteries
Source: Royal Society of Chemistry journal article supplement (doi:10.1039/d0ta10205a), 2020-12-15
Supplement: d0ta10205a1.pdf [file d0ta10205a1.pdf]

## Supplementary Materials

### **Fe<sub>3</sub>O<sub>4</sub>/Fe<sub>2</sub>O<sub>3</sub>/Fe nanoparticles anchored on N-doped hierarchically porous carbon nanospheres as high-efficiency ORR electrocatalysts for rechargeable Zn-air batteries**

*Yali Wang<sup>a</sup>, Ruihui Gan<sup>a</sup>, Hao Liu<sup>a</sup>, Mahmut Dirican<sup>b</sup>, Chengbiao Wei<sup>a</sup>, Chang Ma*

*<sup>a, b, \*</sup>, Jingli Shi<sup>a,\*</sup>, Xiangwu Zhang<sup>b</sup>*

*<sup>a</sup> Tianjin Municipal Key Lab of Advanced Fiber and Energy Storage Technology,  
Tiangong University, Tianjin 300387, P. R. China.*

*<sup>b</sup> Fiber and Polymer Science Program, Department of Textile Engineering, Chemistry  
and Science, Wilson College of Textiles, North Carolina State University, Raleigh,  
North Carolina 27695-8301, United States*

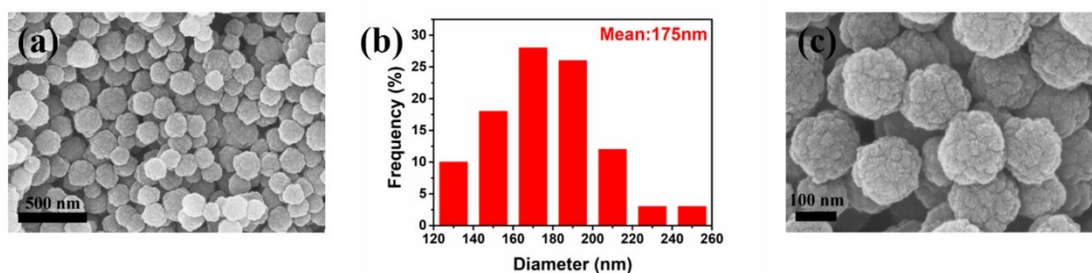

**Figure S1.** SEM images of the Fe-CNSs-C sample.

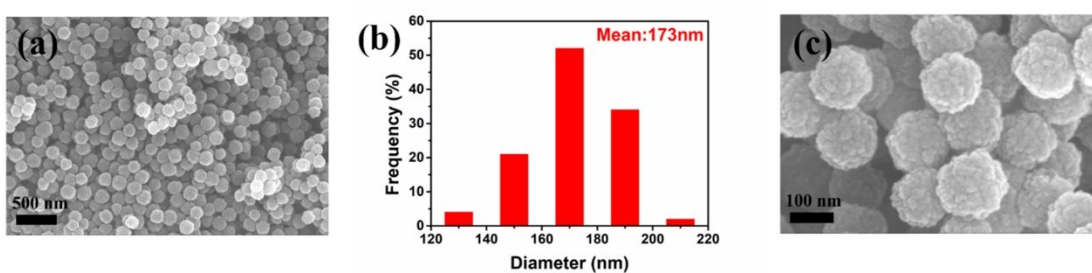

**Figure S2.** SEM images of CNSs-N sample.

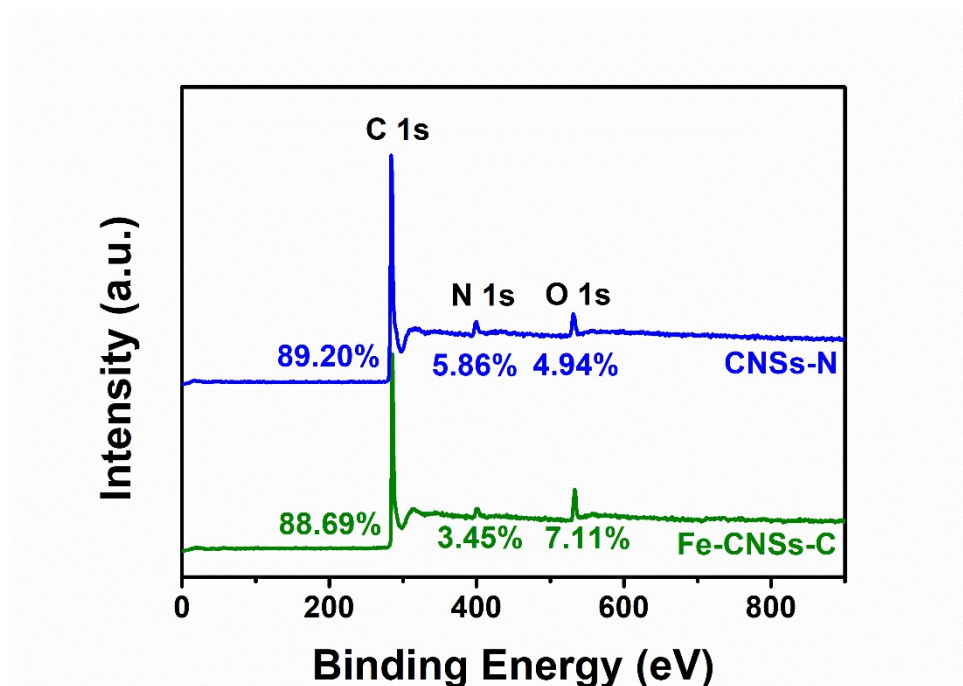

**Figure S3.** Survey spectra of CNSs-N and Fe-CNSs-C.

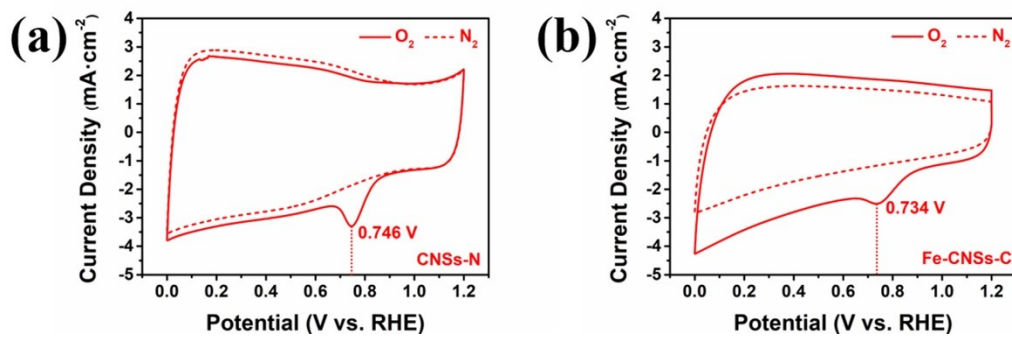

**Figure S4.** CVs of CNSs-N and Fe-CNSs-C.

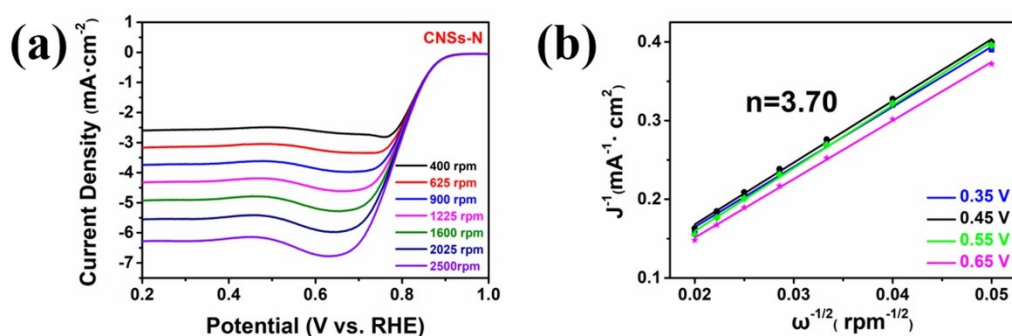

**Figure S5.** (a) LSV curves of CNSs-N at a scan rate of  $10 \text{ mV} \cdot \text{s}^{-1}$  and various rotating rates from 400 to 2500 rpm. (b) K-L plots of CNSs-N derived from LSV curves at various potentials.

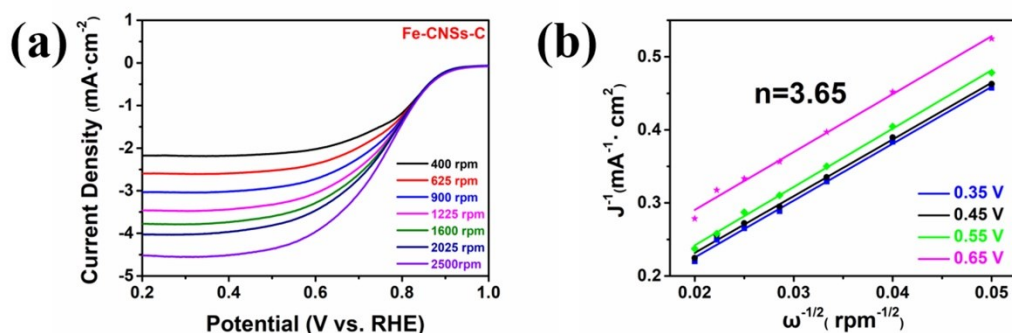

**Figure S6.** (a) LSV curves of Fe-CNSs-C at a scan rate of  $10 \text{ mV} \cdot \text{s}^{-1}$  and various rotating rates from 400 to 2500 rpm. (b) K-L plots of Fe-CNSs-C derived from LSV curves at various potentials.

**Table S1.** The electrocatalytic performances of Fe-CNSs-N, Fe-CNSs-C, CNSs-N and Pt/C for oxygen reduction reaction in alkaline electrolytes.

| Catalyst  | $E_{\text{onset}}$ (V vs RHE) | $E_{1/2}$ (V vs RHE) | $J_K$ ( $\text{mA}\cdot\text{cm}^{-2}$ ) |
|-----------|-------------------------------|----------------------|------------------------------------------|
| Pt/C      | 0.947                         | 0.828                | 5.52                                     |
| Fe-CNSs-N | 0.948                         | 0.835                | 5.17                                     |
| Fe-CNSs-C | 0.937                         | 0.765                | 3.81                                     |
| CNSs-N    | 0.910                         | 0.809                | 4.79                                     |

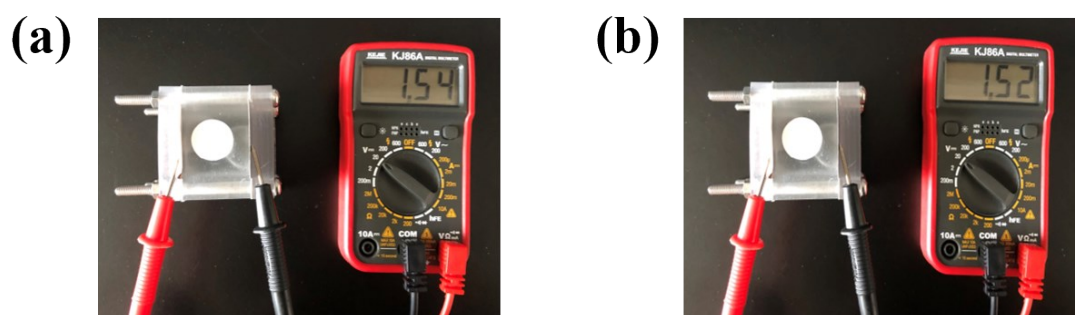

**Figure S7.** The photographs of the open-circuit voltage of the Zn-air batteries using Fe-CNSs-N (a) and commercial Pt/C (b) as air electrodes measured by multimeter.
